# Supplementary material
Source: PubMed Central journal article supplement (PMC7935083)
Supplement: NIHMS1650971-supplement-1.pdf [file NIHMS1650971-supplement-1.pdf]

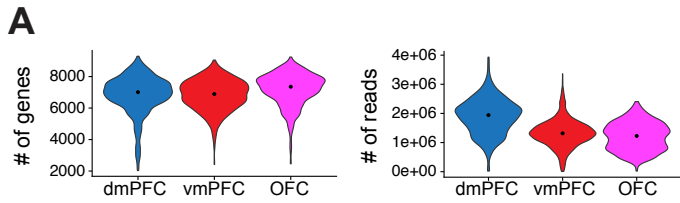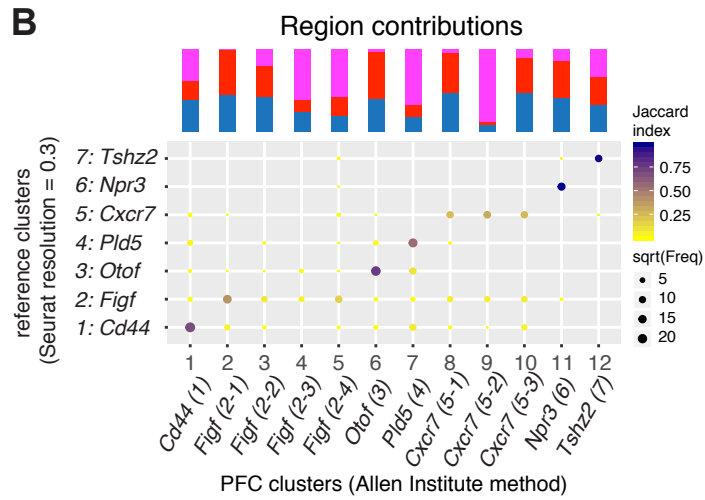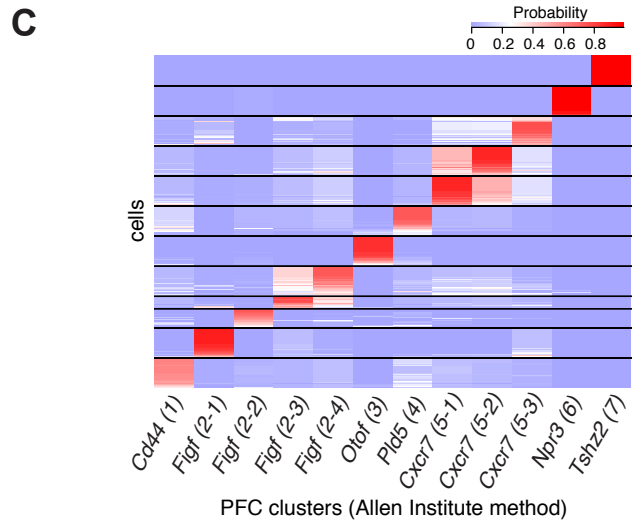

**D**

*Rbp4Cre+* clusters in ALM and VISp

L5 IT ALM *Cbln4* *Fezf2*  
L5 IT ALM *Gkn1* *Pcdh19*  
L5 IT ALM *Lypd1* *Gpr88*  
L5 IT ALM *Pld5*  
L5 IT ALM *Tmem163* *Dmrtb1*  
L5 IT ALM *Tnc*  
L5 IT ALM *Tmem163* *Arhgap25*  
L6 IT ALM *Oprk1*  
L6 IT ALM *Tgfb1*

ALM  
IT

L5 IT VISp *Batf3*  
L5 IT VISp *Col27a1*

VISp  
IT

L5 IT VISp *Col6a1* *Fezf2*  
L6 IT VISp *Col18a1*  
L6 IT VISp *Penk* *Fst*  
L6 IT VISp *Col23a1* *Adamts2*

VISp  
PT

L5 PT VISp *C1ql2* *Cdh13*  
L5 PT VISp *C1ql2* *Ptgr*  
L5 PT VISp *Krt80*

other

L5 NP ALM *Trhr* *Nefl*  
L6 CT VISp *Nxph2* *Wls*
