# Supplementary material
Source: PubMed Central journal article supplement (PMC7935083)

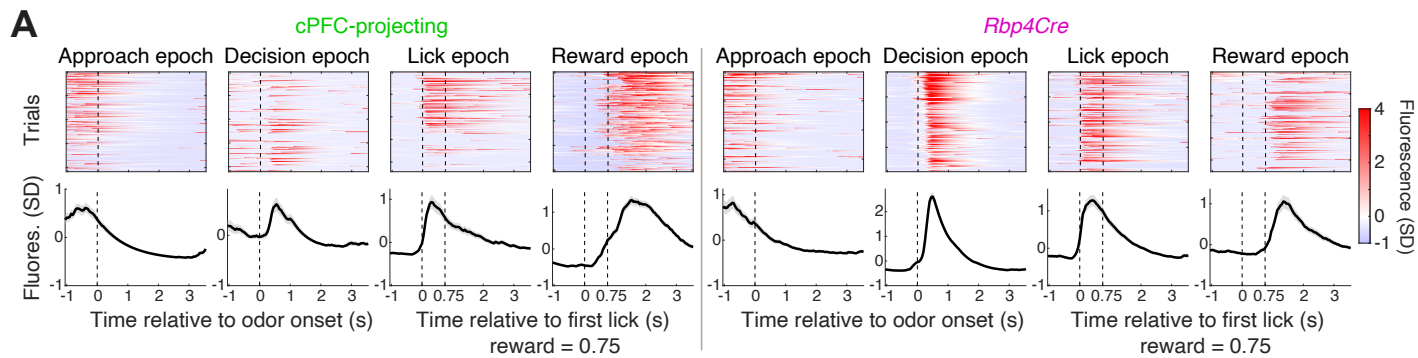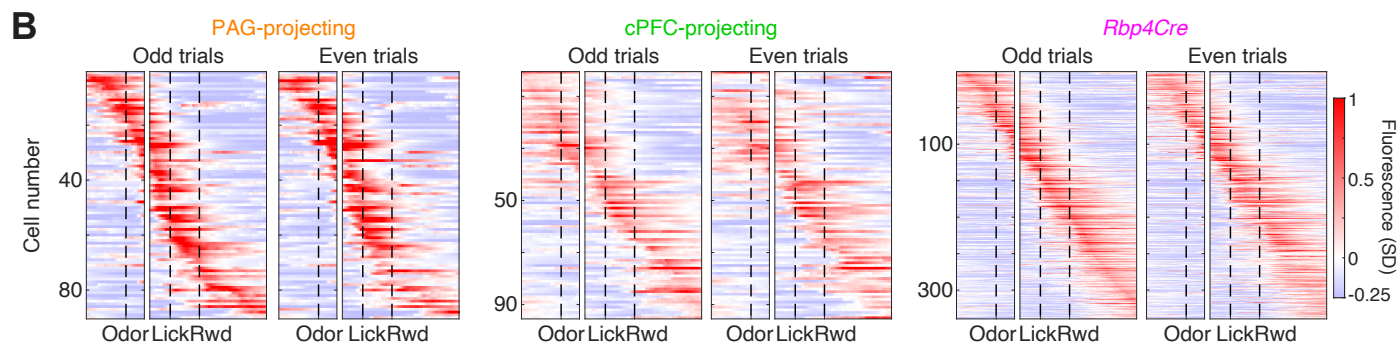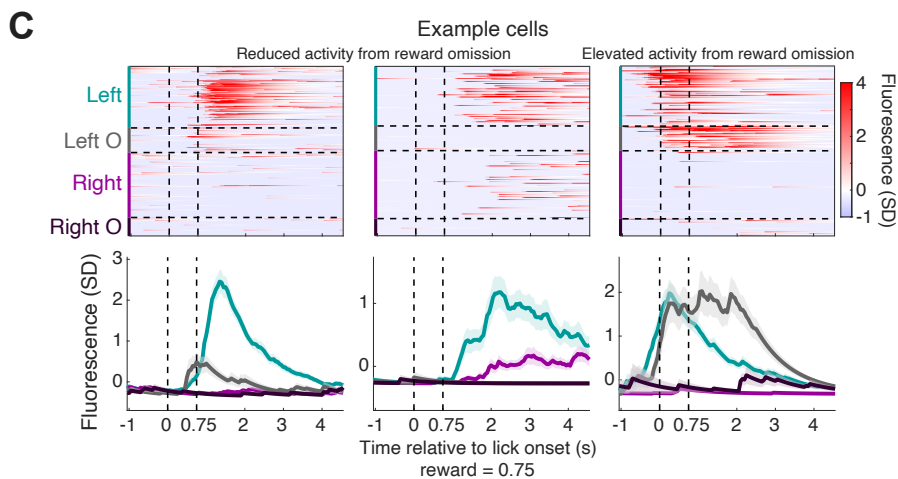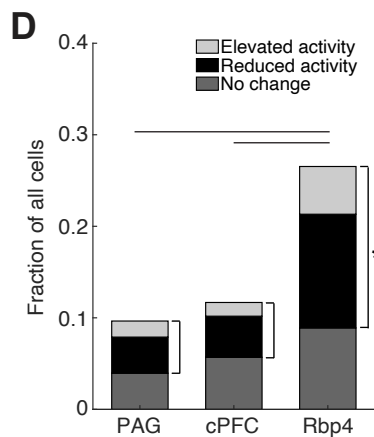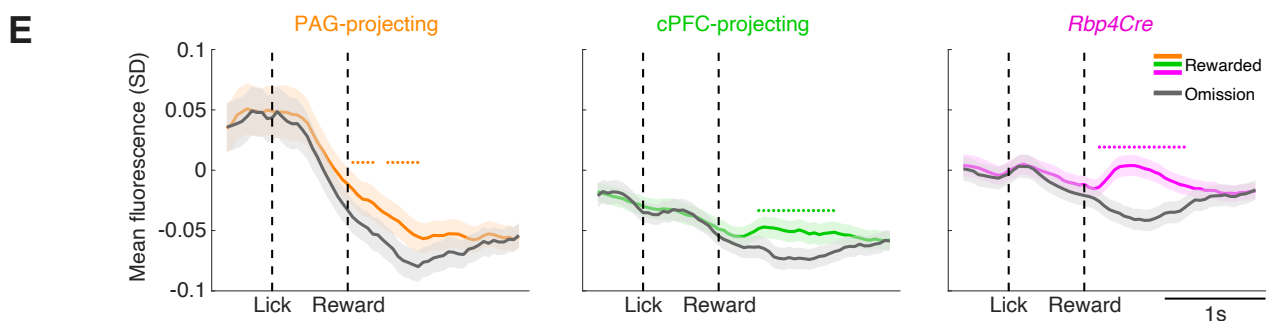

Supplement: NIHMS1650971-supplement-5.pdf [file NIHMS1650971-supplement-5.pdf]

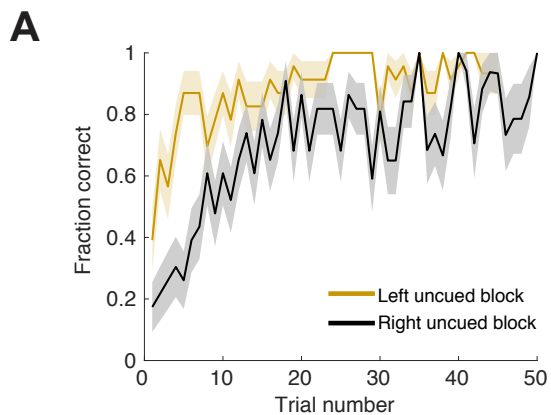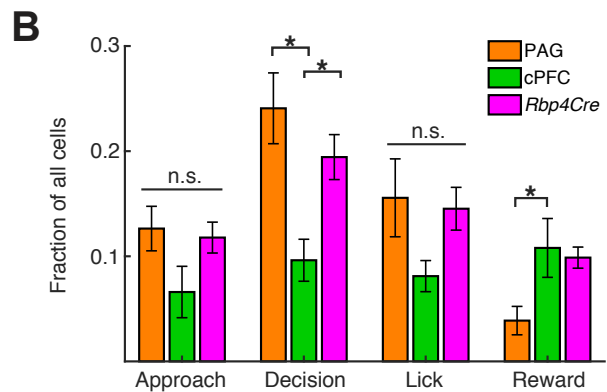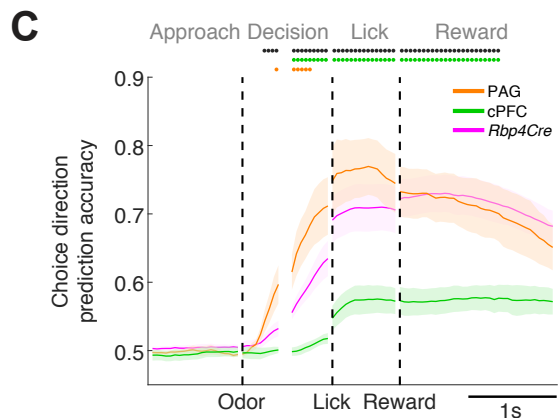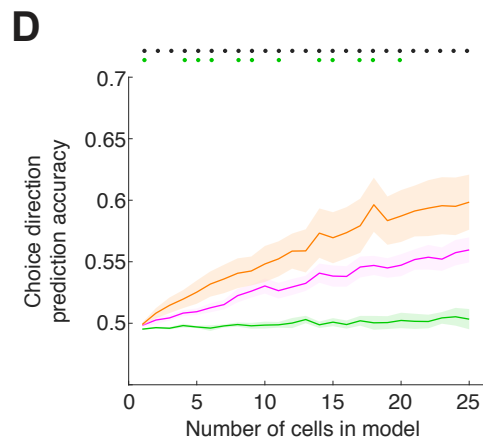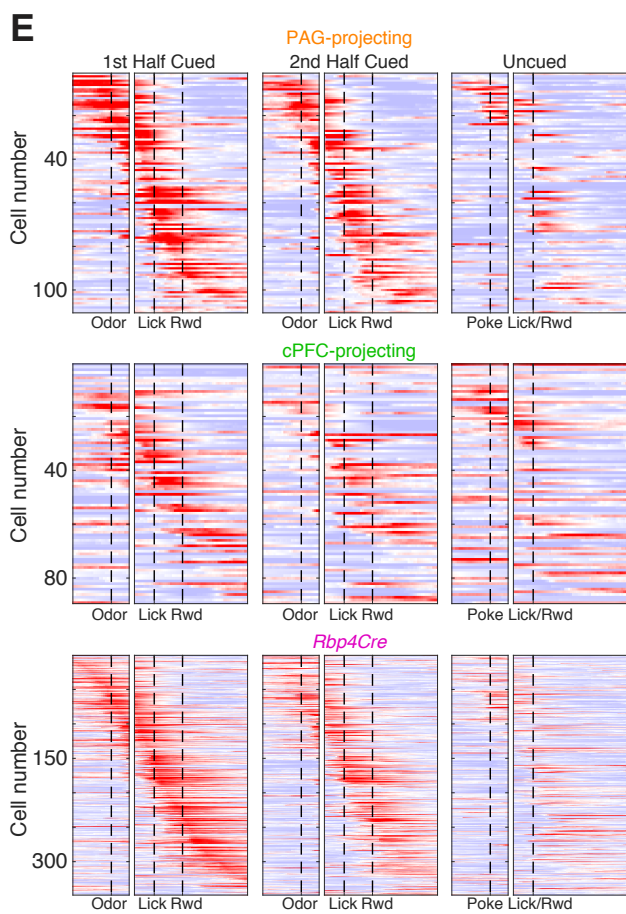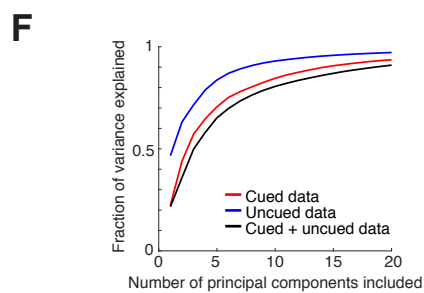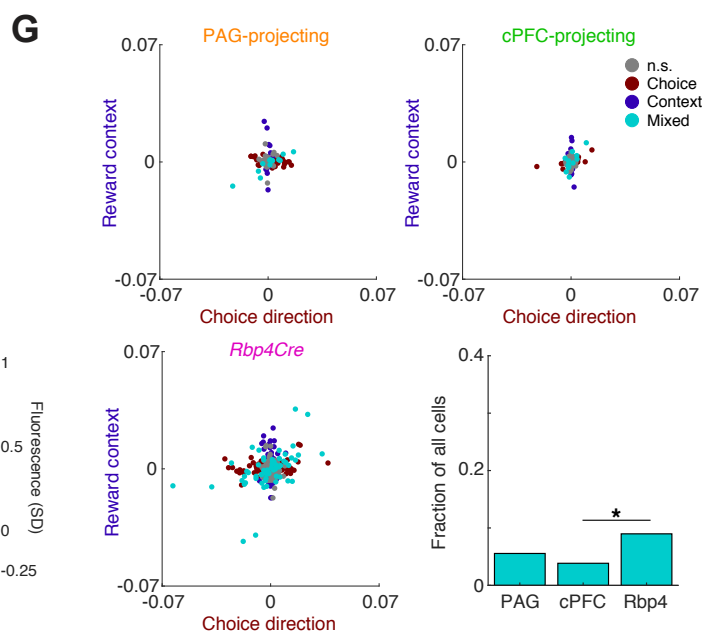

Supplement: NIHMS1650971-supplement-7.pdf [file NIHMS1650971-supplement-7.pdf]
